# Supplementary material
Source: PubMed Central journal article supplement (PMC4105584)

## **SUPPLEMENTAL MATERIAL**

### **A Nutrient-Wide Association Study on Blood Pressure**

**Short title: A nutrient-wide association study**

Ioanna Tzoulaki, PhD\*, Chirag J Patel, PhD\*, Tomonori Okamura, MD, PhD, Queenie Chan, PhD, Ian J Brown, PhD, Katsuyuki Miura MD, PhD, Hirotsugu Ueshima, MD, PhD, Liancheng Zhao, MD, Linda Van Horn, PhD, Martha Daviglus, MD, PhD, Jeremiah Stamler, MD, Atul J Butte, PhD, John PA Ioannidis, MD, DSc#, Paul Elliott, MB, PhD#

\* and #: equal contribution for first and senior authors

**Online Supplementary Tables 1 – 7**

**Online Supplementary Figure 1**

## Online Supplementary Tables

**Supplementary Table 1. Descriptive characteristics of INTERMAP study participants by country**

| Variable                                   | China (N=1145) |         | Japan (N=839) |         | UK (N=501) |         | US (N=2195) |         |
|--------------------------------------------|----------------|---------|---------------|---------|------------|---------|-------------|---------|
|                                            | Mean or %      | SD      | Mean or %     | SD      | Mean       | SD      | Mean        | SD      |
| Age (years)                                | 49.37          | 5.31    | 48.96         | 5.80    | 49.15      | 5.61    | 49.14       | 5.39    |
| Height (m)                                 | 1.61           | 0.09    | 1.59          | 0.08    | 1.69       | 0.09    | 1.68        | 0.10    |
| Weight (kg)                                | 61.22          | 10.15   | 58.93         | 10.01   | 78.22      | 15.25   | 82.25       | 19.56   |
| Body mass index (kg/m <sup>2</sup> )       | 23.43          | 2.91    | 23.13         | 3.36    | 27.46      | 4.64    | 28.90       | 5.92    |
| Males                                      | 50.0%          |         | 50.4%         |         | 46.9%      |         | 49.7%       |         |
| Previous heart disease, stroke or diabetes | 11.4%          |         | 7%            |         | 10.8%      |         | 15.6%       |         |
| Family history of hypertension             | 46.1%          |         | 35.5%         |         | 48.3%      |         | 67.9%       |         |
| Systolic BP                                | 117.24         | 13.79   | 121.26        | 17.42   | 120.40     | 14.55   | 118.60      | 13.89   |
| Diastolic BP                               | 73.64          | 10.30   | 73.19         | 10.22   | 77.29      | 9.93    | 73.41       | 9.68    |
| <i>Urinary excretion</i>                   |                |         |               |         |            |         |             |         |
| Urinary sodium to potassium ratio          | 4.23           | 1.24    | 6.31          | 2.83    | 2.23       | 0.80    | 3.04        | 1.20    |
| Urinary calcium (mmol/24h)                 | 4.30           | 1.74    | 4.47          | 2.09    | 4.04       | 1.96    | 4.21        | 2.17    |
| Urinary magnesium (mmol/24h)               | 3.22           | 0.95    | 4.08          | 1.27    | 3.71       | 1.13    | 4.25        | 1.58    |
| <i>Nutrients from foods</i>                |                |         |               |         |            |         |             |         |
| Estimated Dietary Total Protein            | 69.65          | 16.41   | 59.59         | 16.86   | 68.16      | 18.82   | 73.13       | 23.44   |
| Alcohol (gm)                               | 17.02          | 22.58   | 8.62          | 21.37   | 14.73      | 19.20   | 6.95        | 13.69   |
| Animal protein (mg/day)                    | 45.15          | 16.00   | 12.83         | 13.22   | 51.35      | 20.73   | 55.94       | 23.62   |
| Beta-Carotene (mcg.day)                    | 2978.93        | 2016.87 | 2399.88       | 2066.96 | 2207.40    | 1711.44 | 3941.94     | 3769.61 |
| Caffeine (mg/day)                          | 134.52         | 97.25   | 13.09         | 31.21   | 258.93     | 150.47  | 260.40      | 258.27  |
| Calcium (mg/day)                           | 606.12         | 221.24  | 302.50        | 142.45  | 933.04     | 319.15  | 791.30      | 371.61  |
| Cholesterol (mg/day)                       | 402.50         | 163.81  | 181.67        | 181.44  | 261.78     | 133.44  | 296.33      | 159.87  |
| Copper (mg/day)                            | 1.36           | 0.41    | 2.37          | 0.72    | 1.37       | 0.45    | 1.46        | 0.57    |
| Total energy intake (kcal/day)             | 2038.64        | 449.05  | 2035.84       | 576.77  | 2167.78    | 631.80  | 2244.20     | 698.70  |
| Folacin (mcg/day)                          | 360.72         | 127.02  | 293.57        | 135.40  | 298.08     | 108.69  | 290.38      | 128.53  |
| Iron (mg/day)                              | 10.66          | 2.85    | 15.81         | 5.68    | 13.08      | 4.22    | 16.88       | 7.09    |
| Magnesium (mg/day)                         | 268.97         | 65.99   | 308.23        | 115.26  | 319.62     | 93.82   | 318.66      | 111.91  |
| Myristoleic acid (g/day)                   | 0.10           | 0.07    | 0.01          | 0.01    | 0.20       | 0.15    | 0.07        | 0.09    |
| Palmitoleic acid (g/day)                   | 1.01           | 0.40    | 0.542309297   | 0.44    | 1.50       | 0.75    | 1.55        | 0.85    |
| Oleic acid (g/day)                         | 18.31          | 6.18    | 15.35         | 8.15    | 24.75      | 9.99    | 29.75       | 12.59   |
| Gadoleic acid (g/day)                      | 0.61           | 0.31    | 0.32          | 0.30    | 0.48       | 0.32    | 0.19        | 0.14    |

|                                    |         |        |         |        |         |        |         |         |
|------------------------------------|---------|--------|---------|--------|---------|--------|---------|---------|
| Erucic acid (g/day)                | 0.35    | 0.29   | 2.27    | 3.28   | 0.32    | 0.27   | 0.05    | 0.10    |
| Niacin (mg)                        | 16.29   | 5.15   | 13.77   | 5.36   | 22.99   | 12.69  | 25.14   | 8.64    |
| Pantothenic Acid (mg)              | 5.96    | 1.42   | 4.44    | 1.56   | 5.44    | 1.68   | 4.92    | 2.01    |
| Linoleic acid (g/day)              | 11.26   | 3.86   | 12.16   | 6.64   | 13.30   | 6.30   | 15.82   | 7.31    |
| Linolenic acid (g/day)             | 1.84    | 0.73   | 1.23    | 0.91   | 1.39    | 0.64   | 1.69    | 0.84    |
| PFA 18:4 (gm)                      | 0.08    | 0.07   |         |        | 0.00    | 0.01   | 0.00    | 0.02    |
| Arachidonic acid (g/day)           | 0.16    | 0.06   | 0.04    | 0.04   | 0.18    | 0.11   | 0.15    | 0.10    |
| Eicosapentaenoic acid (g/day)      | 0.39    | 0.28   | 0.02    | 0.04   | 0.12    | 0.16   | 0.05    | 0.10    |
| Docosapentaenoic acid (g/day)      | 0.10    | 0.08   | 0.00    | 0.00   | 0.09    | 0.06   | 0.02    | 0.04    |
| Docosahexaenoic acid (g/day)       | 0.66    | 0.39   | 0.01    | 0.02   | 0.15    | 0.20   | 0.10    | 0.19    |
| Phosphorus (mg/day)                | 1134.43 | 282.34 | 878.92  | 306.64 | 1392.29 | 410.37 | 1295.33 | 441.41  |
| Potassium (mg/day)                 | 2786.88 | 700.87 | 1850.46 | 582.62 | 3355.49 | 901.08 | 2909.41 | 1006.63 |
| Total Protein (g/day)              | 80.71   | 19.86  | 63.00   | 19.70  | 83.47   | 25.13  | 84.92   | 28.40   |
| Retinol (mcg/day)                  | 373.13  | 706.06 | 98.10   | 171.71 | 468.65  | 451.76 | 467.95  | 527.50  |
| Riboflavin (mg)                    | 1.40    | 0.41   | 0.70    | 0.25   | 1.85    | 0.73   | 2.00    | 0.76    |
| Selenium (mcg/day)                 | 171.05  | 74.62  | 33.93   | 13.64  | 94.57   | 37.94  | 131.48  | 65.17   |
| SFA 4:0 (gm)                       | 0.19    | 0.16   |         |        | 0.58    | 0.49   | 0.46    | 0.37    |
| Caproic acid (g/day)               | 0.12    | 0.10   | 0.00    | 0.00   | 0.36    | 0.30   | 0.23    | 0.19    |
| Caprylic acid (g/day)              | 0.08    | 0.07   | 0.00    | 0.01   | 0.27    | 0.21   | 0.22    | 0.19    |
| Capric acid (g/day)                | 0.15    | 0.13   | 0.01    | 0.01   | 0.58    | 0.45   | 0.43    | 0.30    |
| Lauric acid (g/day)                | 0.22    | 0.20   | 0.06    | 0.09   | 1.30    | 0.95   | 1.00    | 1.06    |
| Myristic acid (g/day)              | 1.07    | 0.54   | 0.26    | 0.19   | 3.14    | 1.88   | 2.27    | 1.35    |
| Palmitic acid (g/day)              | 9.10    | 2.92   | 7.60    | 3.87   | 15.55   | 6.63   | 15.16   | 6.46    |
| Stearic acid (g/day)               | 3.45    | 1.28   | 2.66    | 1.80   | 7.70    | 3.48   | 7.58    | 3.45    |
| Arachidic acid (g/day)             | 0.20    | 0.08   | 0.26    | 0.16   | 0.25    | 0.14   | 0.03    | 0.06    |
| Behenic acid (g/day)               | 0.08    | 0.06   | 0.56    | 0.47   | 0.22    | 0.20   | 0.04    | 0.08    |
| Starch (g/day)                     | 179.22  | 53.83  | 282.88  | 90.41  | 145.01  | 48.81  | 125.11  | 44.82   |
| Sugar (g/day)                      | 93.66   | 27.02  | 43.97   | 30.88  | 107.76  | 42.51  | 148.78  | 65.54   |
| Total Fibre (gm)                   | 15.63   | 4.77   | 28.14   | 9.50   | 25.47   | 9.22   | 19.11   | 7.87    |
| Thiamin (mg)                       | 0.92    | 0.25   | 1.05    | 0.33   | 1.93    | 1.51   | 1.89    | 0.67    |
| Omega-3 polyunsaturates (g/day)    | 3.07    | 1.12   | 1.25    | 0.92   | 1.76    | 0.80   | 1.87    | 0.93    |
| Omega-6 polyunsaturates (g/day)    | 11.45   | 3.88   | 12.20   | 6.65   | 13.49   | 6.33   | 15.97   | 7.35    |
| Dietary Vitamin E (mg/day)         | 10.02   | 3.24   | 10.80   | 4.64   | 9.73    | 4.65   | 9.99    | 5.05    |
| Dietary Total Carbohydrate (g/day) | 272.89  | 63.56  | 326.85  | 99.44  | 252.77  | 76.60  | 273.90  | 91.50   |
| Dietary Total Fat (g/day)          | 56.80   | 16.65  | 45.94   | 20.37  | 80.96   | 31.74  | 84.35   | 33.94   |

|                                             |         |         |         |         |         |         |         |         |
|---------------------------------------------|---------|---------|---------|---------|---------|---------|---------|---------|
| Dietary Total MFA (g/day)                   | 20.60   | 6.73    | 18.53   | 8.65    | 27.26   | 10.98   | 31.88   | 13.46   |
| Dietary Total PFA (g/day)                   | 14.58   | 4.63    | 13.49   | 6.99    | 15.24   | 6.87    | 17.94   | 8.11    |
| Dietary Total SFA (g/day)                   | 14.98   | 5.13    | 11.51   | 5.87    | 29.94   | 13.63   | 28.03   | 12.54   |
| Total trans-fatty acids (g/day)             | 0.99    | 0.67    | 0.42    | 0.80    | 3.34    | 1.93    | 5.03    | 2.83    |
| Dietary Total Vitamin A (RE)                | 870.11  | 767.52  | 496.88  | 392.07  | 838.24  | 538.13  | 1124.94 | 843.74  |
| Trans-octadecenoic acid (mg)                | 0.82    | 0.61    | 0.29    | 0.64    | 2.41    | 1.37    | 4.28    | 2.49    |
| Trans-octadecenoic (mg)                     | 0.15    | 0.07    | 0.09    | 0.16    | 0.50    | 0.45    | 0.64    | 0.35    |
| Vegetable Protein (g/day)                   | 35.56   | 8.43    | 50.19   | 15.65   | 32.12   | 10.74   | 28.02   | 10.77   |
| Vitamin A (IU/day)                          | 6208.38 | 4011.10 | 4326.81 | 3518.85 | 5240.96 | 3242.98 | 8141.09 | 6634.26 |
| Vitamin B12 (mcg)                           | 9.03    | 5.63    | 1.00    | 1.55    | 4.76    | 2.63    | 5.06    | 5.31    |
| Vitamin B6 (mg)                             | 1.29    | 0.38    | 1.57    | 0.57    | 2.07    | 0.79    | 1.95    | 0.76    |
| Vitamin C                                   | 128.61  | 76.15   | 77.71   | 40.65   | 86.30   | 54.80   | 110.53  | 76.40   |
| Sum of EPA, DPA and DHA (gr/day)            | 1.15    | 0.73    | 0.02    | 0.05    | 0.36    | 0.38    | 0.18    | 0.31    |
| Alanine (g/day)                             | 4.08    | 1.07    | 3.16    | 1.14    | 3.81    | 1.26    | 4.07    | 1.48    |
| Arginine (g/day)                            | 4.83    | 1.25    | 3.60    | 1.36    | 4.38    | 1.41    | 4.70    | 1.69    |
| Spartic acid (g/day)                        | 7.49    | 1.91    | 5.19    | 1.98    | 7.25    | 2.21    | 7.22    | 2.53    |
| Cystine (g/day)                             | 1.26    | 0.28    | 1.33    | 0.38    | 1.15    | 0.34    | 1.14    | 0.37    |
| Glutamic acid (g/day)                       | 14.19   | 3.19    | 14.97   | 5.09    | 16.83   | 4.88    | 16.54   | 5.34    |
| Glycine (g/day)                             | 3.46    | 0.94    | 2.74    | 1.02    | 3.43    | 1.15    | 3.63    | 1.37    |
| Histidine (g/day)                           | 2.53    | 0.73    | 1.48    | 0.53    | 2.30    | 0.75    | 2.38    | 0.85    |
| Isoleucine (g/day)                          | 3.56    | 0.89    | 2.54    | 0.84    | 3.83    | 1.18    | 3.86    | 1.33    |
| Leucine (g/day)                             | 6.21    | 1.52    | 4.86    | 1.53    | 6.38    | 1.95    | 6.57    | 2.24    |
| Lysine (g/day)                              | 5.27    | 1.50    | 2.84    | 1.36    | 5.41    | 1.84    | 5.69    | 2.12    |
| Methionine (g/day)                          | 1.89    | 0.50    | 1.09    | 0.41    | 1.84    | 0.60    | 1.93    | 0.69    |
| Phenylalanine (g/day)                       | 3.57    | 0.83    | 3.07    | 0.95    | 3.68    | 1.09    | 3.69    | 1.22    |
| Proline (g/day)                             | 4.50    | 1.07    | 3.93    | 1.89    | 5.69    | 1.69    | 5.45    | 1.83    |
| Threonine (g/day)                           | 3.16    | 0.82    | 2.28    | 0.82    | 3.20    | 1.01    | 3.28    | 1.15    |
| Tryptophan (g/day)                          | 0.95    | 0.23    | 0.92    | 0.30    | 1.01    | 0.30    | 0.99    | 0.34    |
| Tyrosine (g/day)                            | 2.74    | 0.68    | 2.14    | 0.71    | 2.90    | 0.88    | 2.96    | 1.02    |
| Valine (g/day)                              | 4.24    | 1.03    | 3.36    | 1.12    | 4.30    | 1.30    | 4.30    | 1.46    |
| <i>Nutrients from foods and supplements</i> |         |         |         |         |         |         |         |         |
| Alanine (gm)                                | 4.09    | 1.08    | 3.16    | 1.14    | 3.82    | 1.28    | 4.07    | 1.48    |
| Potassium (mg)                              | 2790.67 | 702.62  | 1850.46 | 582.62  | 3356.33 | 901.11  | 2928.92 | 1011.98 |
| Alcohol (gm)                                | 15.96   | 22.47   | 8.96    | 22.07   | 13.42   | 19.54   | 6.83    | 15.35   |
| Proline (gm)                                | 4.50    | 1.08    | 3.93    | 1.89    | 5.69    | 1.70    | 5.45    | 1.83    |

|                     |         |         |         |         |         |         |         |         |
|---------------------|---------|---------|---------|---------|---------|---------|---------|---------|
| Animal protein (gm) | 45.15   | 16.00   | 12.83   | 13.22   | 51.35   | 20.73   | 55.94   | 23.62   |
| Protein (gm)        | 80.87   | 20.05   | 63.00   | 19.70   | 83.67   | 25.67   | 84.94   | 28.40   |
| Arginine (gm)       | 4.84    | 1.26    | 3.60    | 1.36    | 4.38    | 1.41    | 4.70    | 1.69    |
| Retinol (mcg)       | 390.69  | 758.35  | 98.10   | 171.71  | 621.73  | 587.75  | 873.94  | 1068.05 |
| Aspartic acid (gm)  | 7.51    | 1.93    | 5.19    | 1.98    | 7.26    | 2.24    | 7.22    | 2.53    |
| Riboflavin (mg)     | 1.63    | 1.24    | 0.70    | 0.29    | 2.87    | 13.85   | 5.82    | 13.98   |
| Beta-Carotene (mcg) | 3046.47 | 2204.81 | 2399.88 | 2066.96 | 2354.19 | 2159.80 | 4543.74 | 4475.66 |
| Selenium (mcg)      | 171.09  | 74.62   | 33.93   | 13.64   | 96.39   | 39.44   | 141.77  | 73.99   |
| Caffeine (mg)       | 135.88  | 97.33   | 13.09   | 31.21   | 258.93  | 150.47  | 260.40  | 258.27  |
| Serine (gm)         | 3.55    | 0.85    | 2.99    | 0.93    | 3.77    | 1.13    | 3.80    | 1.26    |
| Calcium (mg)        | 614.62  | 233.73  | 303.22  | 144.01  | 955.81  | 355.94  | 937.71  | 498.05  |
| SFA 6:0 (gm)        | 0.12    | 0.10    | 0.00    | 0.00    | 0.36    | 0.30    | 0.23    | 0.19    |
| Cholesterol (mg)    | 402.50  | 163.81  | 181.67  | 181.44  | 262.62  | 133.77  | 296.42  | 159.85  |
| SFA 8:0 (gm)        | 0.08    | 0.07    | 0.00    | 0.01    | 0.27    | 0.21    | 0.22    | 0.19    |
| Copper (mg)         | 1.36    | 0.41    | 2.37    | 0.72    | 1.38    | 0.47    | 2.13    | 5.25    |
| SFA 10:0 (gm)       | 0.15    | 0.13    | 0.01    | 0.01    | 0.58    | 0.45    | 0.43    | 0.30    |
| Cystine (gm)        | 1.27    | 0.28    | 1.33    | 0.38    | 1.15    | 0.35    | 1.14    | 0.37    |
| SFA 12:0 (gm)       | 0.22    | 0.20    | 0.06    | 0.09    | 1.30    | 0.95    | 1.00    | 1.06    |
| Glutamic acid (gm)  | 14.23   | 3.24    | 14.97   | 5.09    | 16.84   | 4.90    | 16.55   | 5.34    |
| SFA 14:0 (gm)       | 1.07    | 0.54    | 0.26    | 0.19    | 3.14    | 1.88    | 2.27    | 1.35    |
| Glycine (gm)        | 3.47    | 0.95    | 2.74    | 1.02    | 3.45    | 1.24    | 3.63    | 1.37    |
| SFA 16:0 (gm)       | 9.10    | 2.92    | 7.60    | 3.87    | 15.57   | 6.64    | 15.17   | 6.46    |
| Histidine (gm)      | 2.54    | 0.73    | 1.48    | 0.53    | 2.30    | 0.76    | 2.38    | 0.85    |
| Iron (mg)           | 10.82   | 3.57    | 16.53   | 21.33   | 14.31   | 8.28    | 23.21   | 32.59   |
| SFA 18:0 (gm)       | 3.45    | 1.28    | 2.66    | 1.80    | 7.70    | 3.48    | 7.58    | 3.45    |
| Isoleucine (gm)     | 3.57    | 0.90    | 2.54    | 0.84    | 3.84    | 1.20    | 3.86    | 1.33    |
| SFA 20:0 (gm)       | 0.20    | 0.08    | 0.26    | 0.16    | 0.25    | 0.14    | 0.03    | 0.06    |
| PFA 22:5 (gm)       | 0.05    | 0.03    | 0.00    | 0.00    | 0.00    | 0.00    | 0.00    | 0.00    |
| Leucine (gm)        | 6.23    | 1.54    | 4.86    | 1.53    | 6.39    | 1.97    | 6.57    | 2.24    |
| SFA 22:0 (gm)       | 0.08    | 0.06    | 0.56    | 0.47    | 0.22    | 0.20    | 0.04    | 0.09    |
| PFA 20:5 (gm)       | 0.17    | 0.11    | 0.01    | 0.02    | 0.00    | 0.00    | 0.02    | 0.05    |
| Lysine (gm)         | 5.28    | 1.51    | 2.84    | 1.36    | 5.43    | 1.87    | 5.70    | 2.13    |
| Magnesium (mg)      | 269.50  | 66.16   | 308.23  | 115.26  | 325.73  | 112.01  | 359.01  | 162.26  |
| Starch (gm)         | 179.22  | 53.83   | 282.88  | 90.41   | 145.01  | 48.81   | 125.13  | 44.82   |
| Methionine (gm)     | 1.90    | 0.51    | 1.09    | 0.41    | 1.85    | 0.61    | 1.93    | 0.69    |

|                            |         |         |         |         |         |         |          |         |
|----------------------------|---------|---------|---------|---------|---------|---------|----------|---------|
| Total fibre (gr)           | 15.63   | 4.77    | 28.14   | 9.50    | 25.47   | 9.22    | 19.17    | 7.91    |
| MFA 14:1 (gm)              | 0.10    | 0.07    | 0.01    | 0.01    | 0.20    | 0.15    | 0.07     | 0.09    |
| Threonine (mg)             | 3.17    | 0.82    | 2.28    | 0.82    | 3.21    | 1.02    | 3.28     | 1.15    |
| MFA 16:1 (gm)              | 1.01    | 0.40    | 0.54    | 0.44    | 1.52    | 0.76    | 1.55     | 0.85    |
| Total alpha-toc eq (mg)    | 12.62   | 16.88   | 11.28   | 9.17    | 12.42   | 14.45   | 70.82    | 143.50  |
| MFA 18:1 (gm)              | 18.31   | 6.18    | 15.35   | 8.15    | 24.78   | 10.00   | 29.76    | 12.59   |
| Total Carbohydrate (gm)    | 273.34  | 63.65   | 326.85  | 99.44   | 252.80  | 76.59   | 274.05   | 91.49   |
| MFA 20:1 (gm)              | 0.61    | 0.31    | 0.32    | 0.30    | 0.50    | 0.34    | 0.19     | 0.15    |
| Total Fat (gm)             | 56.80   | 16.65   | 45.94   | 20.37   | 81.24   | 31.81   | 84.39    | 33.94   |
| MFA 22:1 (gm)              | 0.35    | 0.29    | 2.27    | 3.28    | 0.33    | 0.28    | 0.05     | 0.11    |
| Total MFA (gm)             | 20.60   | 6.73    | 18.53   | 8.65    | 27.33   | 11.01   | 31.89    | 13.47   |
| Niacin (mg)                | 16.41   | 5.28    | 13.82   | 5.43    | 25.19   | 19.43   | 39.20    | 54.74   |
| Total PFA (gm)             | 14.58   | 4.63    | 13.49   | 6.99    | 15.29   | 6.89    | 17.96    | 8.12    |
| Linoleic acid (gm)         | 11.26   | 3.86    | 12.16   | 6.64    | 13.31   | 6.30    | 15.83    | 7.31    |
| Total fatty acids (gm)     | 14.98   | 5.13    | 11.51   | 5.87    | 29.97   | 13.63   | 28.03    | 12.54   |
| Linolenic acid (gm)        | 1.84    | 0.73    | 1.23    | 0.91    | 1.40    | 0.64    | 1.69     | 0.84    |
| Vitamin A (mg)             | 899.02  | 837.56  | 496.88  | 392.07  | 966.39  | 735.18  | 1631.23  | 1398.19 |
| Eicosapentaenoic acid (gm) | 0.16    | 0.06    | 0.04    | 0.04    | 0.18    | 0.11    | 0.15     | 0.10    |
| Tryptophan (gm)            | 0.95    | 0.23    | 0.92    | 0.30    | 1.01    | 0.30    | 0.99     | 0.34    |
| Docosapentaenoic acid (gm) | 0.39    | 0.28    | 0.02    | 0.04    |         |         | 0.05     | 0.11    |
| Tyrosine (gm)              | 2.74    | 0.69    | 2.14    | 0.71    | 2.90    | 0.90    | 2.97     | 1.02    |
| Docosahexaenoic acid (gm)  | 0.66    | 0.39    | 0.01    | 0.02    | 0.16    | 0.21    | 0.11     | 0.20    |
| Valine (gm)                | 4.24    | 1.04    | 3.36    | 1.12    | 4.31    | 1.32    | 4.30     | 1.46    |
| Phenylalanine (gm)         | 3.58    | 0.85    | 3.07    | 0.95    | 3.68    | 1.10    | 3.70     | 1.22    |
| Vegetable protein (gm)     | 35.56   | 8.43    | 50.19   | 15.65   | 32.12   | 10.74   | 28.02    | 10.77   |
| Phosphorous (mg)           | 1136.41 | 283.41  | 878.92  | 306.64  | 1394.55 | 411.17  | 1318.64  | 450.61  |
| Vitamin A (IU)             | 6380.37 | 4428.95 | 4326.81 | 3518.85 | 5881.70 | 4082.31 | 10672.53 | 8823.85 |
| Thiamin (mg)               | 3.14    | 11.57   | 1.36    | 2.14    | 4.70    | 30.87   | 6.20     | 15.71   |
| Vitamin B12 (mcg)          | 27.69   | 185.32  | 1.00    | 1.56    | 5.34    | 6.64    | 19.20    | 78.55   |
| Vitamin B6 (mg)            | 2.01    | 5.85    | 1.75    | 2.66    | 2.66    | 5.70    | 7.15     | 20.19   |
| Vitamin C (mg)             | 138.49  | 100.45  | 79.80   | 44.31   | 108.09  | 111.71  | 297.13   | 528.06  |
| Folate (mcg)               | 363.02  | 130.07  | 293.57  | 135.40  | 323.08  | 159.68  | 409.35   | 264.08  |
| Omega 3 (mg)               | 3.07    | 1.12    | 1.25    | 0.92    | 1.79    | 0.83    | 1.88     | 0.94    |
| Omega 6 (mg)               | 11.45   | 3.88    | 12.20   | 6.65    | 13.50   | 6.33    | 15.98    | 7.35    |

**Supplementary Table 2. Descriptive characteristics of NHANES cohorts**

| Variable                             | 1999-2000 |         | 2001-2002 |         | 2003-2004 |        | 2005-2006 |        |
|--------------------------------------|-----------|---------|-----------|---------|-----------|--------|-----------|--------|
|                                      | Mean or % | SD      | Mean or % | SD      | Mean or % | SD     | Mean or % | SD     |
| Age (years)                          | 41.76     | 14.9    | 42.44     | 14.86   | 43.54     | 15.52  | 44.3      | 15.88  |
| Sex (Males)                          | 47.90%    |         | 47.60%    |         | 48.30%    |        | 46.80%    |        |
| <i>Ethnicity</i>                     |           |         |           |         |           |        |           |        |
| Non Hispanic White                   | 70.60%    |         | 71.80%    |         | 73.20%    |        | 71.70%    |        |
| Mexican American                     | 6.60%     |         | 7.80%     |         | 8.50%     |        | 8.90%     |        |
| Non Hispanic Blacks                  | 9.90%     |         | 10%       |         | 10.30%    |        | 10.40%    |        |
| Other Hispanic                       | 8.80%     |         | 5.90%     |         | 3.50%     |        | 3.70%     |        |
| Other                                | 4.20%     |         | 4.50%     |         | 4.40%     |        | 5.40%     |        |
| Diastolic BP                         | 71.86     | 11.73   | 71.33     | 12      | 70.61     | 11.46  | 69.46     | 12.03  |
| Systolic BP                          | 117.82    | 14.63   | 117.65    | 14.15   | 118.1     | 13.88  | 117.88    | 14.07  |
| <i>Self-reported disease</i>         |           |         |           |         |           |        |           |        |
| Cardiovascular disease, %            | 9.4       |         | 10.4      |         | 12.2      |        | 11.5      |        |
| Diabetes                             | 4.1       |         | 5.4       |         | 6.5       |        | 6.2       |        |
| Family history of heart disease      | 29.7      |         | 32        |         | 32.1      |        | 14.9      |        |
| Body Mass Index (kg/m <sup>2</sup> ) | 27.64     | 6.18    | 27.79     | 6.28    | 28.01     | 6.12   | 28.23     | 6.32   |
| Total energy intake (kg/day)         | 2252.22   | 1044.99 | 2270.72   | 1045.95 | 2234.94   | 899.13 | 2155.54   | 862.92 |
| <i>Physical Activity</i>             |           |         |           |         |           |        |           |        |
| Inactivity                           | 21.6      |         | 17.2      |         | 14.8      |        | 13.7      |        |
| Low                                  | 27        |         | 27.8      |         | 31.7      |        | 29.6      |        |
| Medium                               | 19.8      |         | 19.1      |         | 20.2      |        | 20.8      |        |
| High                                 | 31.5      |         | 35.9      |         | 33.3      |        | 36        |        |
| Calcium (mg)                         | 860.53    | 607.28  | 890.84    | 611.72  | 913.42    | 520.08 | 952.59    | 511.81 |
| Alcohol (gm)                         | 8.27      | 33.12   | 8.81      | 29.29   | 8.03      | 24.41  | 7.73      | 20.21  |
| Iron (mg)                            | 15.21     | 9.55    | 15.36     | 9.62    | 15.81     | 7.91   | 15.97     | 8.1    |
| Magnesium (mg)                       | 272.87    | 151.28  | 267.05    | 141.49  | 266.96    | 120.57 | 281.73    | 126.13 |
| MFA 16:1 (Hexadecenoic) (gm)         | 1.48      | 1.14    | 1.28      | 0.96    | 1.3       | 0.8    | 1.23      | 0.76   |

|                                |         |        |        |        |         |        |        |        |
|--------------------------------|---------|--------|--------|--------|---------|--------|--------|--------|
| Phosphorus (mg)                | 1283.59 | 653.2  | 1315.1 | 685.55 | 1319.53 | 571.55 | 1316.3 | 568.73 |
| Carbohydrate (gm)              | 276.81  | 138.72 | 276.94 | 135.29 | 267.74  | 115.31 | 260.34 | 110.73 |
| Vitamin A, RAE (mcg)           |         |        | 604.51 | 742.87 | 604.32  | 512.65 | 627.39 | 497.49 |
| Dietary fiber (gm)             | 14.76   | 10.32  | 15.06  | 9.61   | 14.92   | 7.94   | 15.16  | 7.94   |
| Copper (mg)                    | 1.23    | 0.86   | 1.26   | 1.18   | 1.21    | 0.8    | 1.3    | 0.82   |
| Folic acid (mcg)               |         |        | 206.39 | 207.39 | 205.55  | 168.03 | 204.62 | 170.63 |
| Riboflavin (Vitamin B2) (mg)   | 1.97    | 1.14   | 2.19   | 1.24   | 2.26    | 1.1    | 2.24   | 1.12   |
| Thiamin (Vitamin B1) (mg)      | 1.63    | 0.94   | 1.6    | 0.94   | 1.67    | 0.79   | 1.66   | 0.86   |
| Vitamin B6 (mg)                | 1.8     | 1.19   | 1.82   | 1.22   | 1.86    | 0.99   | 1.97   | 1.12   |
| Iron (ug/dL)                   | 89.67   | 37.46  | 88.22  | 38.49  | 81.24   | 36.35  | 78.81  | 35.97  |
| Phosphorus (mg/dL)             | 3.52    | 0.58   | 3.82   | 0.6    | 3.88    | 0.59   | 3.91   | 0.62   |
| Folate, serum (ng/mL)          | 16.27   | 10.17  | 14.56  | 8.96   | 14.14   | 13.74  | 14.23  | 9.4    |
| Dietary Sodium/Potassium Ratio | 1.43    | 0.7    | 1.4    | 0.75   | 1.37    | 0.53   | 1.39   | 0.55   |



**Supplementary Table 3. Adjusted estimated differences in systolic and diastolic blood pressure associated with nutrients received from foods and supplements variables higher by 1SD in INTERMAP testing set excluding individuals on special diet. Only variables that were tentatively validated in INTERMAP testing set are shown.**

| Dietary variable                           | INTERMAP Testing set |         |
|--------------------------------------------|----------------------|---------|
|                                            | Difference (95% CI)  | p value |
| <b>Systolic Blood Pressure</b>             |                      |         |
| <i>Nutrients from foods</i>                |                      |         |
| Alcohol                                    | 3.5 (2.2, 4.8)       | 10-7    |
| Vegetable Protein                          | -3.8 (-6.0, -1.6)    | 10-3    |
| Riboflavin                                 | -2.2 (-3.8, -0.55)   | 0.008   |
| Non-heme iron                              | -0.75 (-1.72, 0.22)  | 0.13    |
| Total Fibre                                | -0.79 (-1.69, 0.11)  | 0.08    |
| Thiamin                                    | -4.0 (-6.0, -2.0)    | 10-4    |
| Glutamic acid                              | -2.2 (-3.8, -0.57)   | 0.008   |
| Magnesium                                  | 2.1 (1.2, 2.9)       | 10-6    |
| Phosphorus                                 | -1.9 (-3.4, -0.42)   | 0.01    |
| Copper                                     | -2.1 (-3.5, -0.74)   | 0.003   |
| Folacin                                    | -1.1 (-2.3, -0.03)   | 0.04    |
| <i>Urinary excretion</i>                   |                      |         |
| Calcium                                    | 0.90 (0.28,1.53)     | 0.004   |
| Sodium to potassium ratio <sup>#</sup>     | 1.75 (0.79,2.71)     | 10-3    |
| <i>Nutrient from foods and supplements</i> |                      |         |
| Alcohol                                    | 1.62 (0.95,2.29)     | 10-6    |
| Vegetable Protein                          | -1.58 (-2.81,-0.34)  | 0.01    |
| Total Fibre                                | -0.81 (-1.71,0.09)   | 0.08    |
| Phosphorus                                 | -1.62 (-2.74,-0.50)  | 0.005   |
| Magnesium                                  | -0.92 (-1.91,0.06)   | 0.07    |
| <b>Diastolic Blood Pressure</b>            |                      |         |
| <i>Nutrients from foods</i>                |                      |         |
| Alcohol                                    | 1.00 (0.54,1.46)     | 10-5    |
| Vegetable Protein                          | -1.04 (-1.89,-0.19)  | 0.02    |
| Riboflavin                                 | -0.91 (-1.65,-0.17)  | 0.02    |
| Phosphorus                                 | -1.01 (-1.79,-0.23)  | 0.01    |
| Magnesium                                  | -0.84 (-1.50,-0.17)  | 0.01    |
| Folacin                                    |                      | 0.02    |
| <i>Nutrient from foods and supplements</i> |                      |         |
| Alcohol                                    | 1.00 (0.54,1.46)     | 10-5    |
| Vegetable Protein                          | -1.04 (-1.89,-0.19)  | 0.02    |
| Phosphorus                                 | -0.94 (-1.73,-0.16)  | 0.02    |
| Magnesium                                  | -0.64 (-1.32,0.04)   | 0.06    |

Analyses are adjusted for age, sex, reported special diet, use of dietary supplements, moderate or heavy physical activity (hours daily), doctor diagnosed cardiovascular disease and diabetes, family history of hypertension, height, weight and total energy intake. The SDs for each variable are listed in Tables 1 and 2.

**Supplementary Table 4. Multivariable analysis in INTERMAP training and testing set. Only variables selected based on FDR<5% and AIC criterion are shown.**

|                                   | INTERMAP training set |                  | INTERMAP testing set |                  |
|-----------------------------------|-----------------------|------------------|----------------------|------------------|
|                                   | Effect size per SD    | P value          | Effect size per SD   | P value          |
| <i>Systolic blood pressure</i>    |                       |                  |                      |                  |
| Alcohol                           | 1.46 (0.89,2.04)      | 10 <sup>-7</sup> | 1.39 (0.74,2.04)     | 10 <sup>-5</sup> |
| Urinary calcium                   | 0.78 (0.21,1.36)      | 0.008            | 1.05 (0.46,1.63)     | 10 <sup>-3</sup> |
| Urinary sodium to potassium ratio | 0.91 (0.08,1.75)      | 0.031            | 1.53 (0.66,2.40)     | 0.001            |
| Phosphorus (diet and supplement)  | 1.82 (0.22,3.42)      | 0.026            | -1.41 (-3.08,0.27)   | 0.099            |
| Retinol                           | -0.61 (-1.22,-0.01)   | 0.047            | -0.15 (-0.75,0.46)   | 0.637            |
| Magnesium (diet and supplement)   | -0.71 (-1.52,0.11)    | 0.089            | -0.21 (-1.23,0.81)   | 0.687            |
| Vitamin B6 (diet and supplement)  | -0.67 (-1.28,-0.06)   | 0.032            | 0.08 (-0.52,0.68)    | 0.795            |
| Nonheme iron                      | -6.26 (-12.99,0.47)   | 0.068            | -0.73 (-6.70,5.23)   | 0.810            |
| Vitamin B12 (diet and supplement) | 0.67 (0.23,1.12)      | 0.003            | 0.05 (-0.64,0.74)    | 0.885            |
| Iron                              | 5.39 (-1.58,12.35)    | 0.129            | 0.42 (-5.58,6.42)    | 0.891            |
| Phenylalanine                     | -1.77 (-3.34,-0.19)   | 0.028            | -0.02 (-1.63,1.58)   | 0.978            |
| <i>Diastolic blood pressure</i>   |                       |                  |                      |                  |
| Alcohol                           | 0.64 (0.25,1.03)      | 0.001            | 0.94 (0.49,1.39)     | 10 <sup>-5</sup> |
| Phosphorus                        | 0.97 (-0.12,2.06)     | 0.081            | -1.19 (-2.31,-0.08)  | 0.035            |
| Leucine                           | 3.19 (-0.73,7.11)     | 0.111            | 2.55 (-1.96,7.06)    | 0.267            |
| Nonheme iron                      | -5.02 (-9.95,-0.09)   | 0.046            | 2.19 (-2.07,6.46)    | 0.313            |
| Glutamic acid                     | -1.18 (-2.58,0.22)    | 0.099            | -0.77 (-2.29,0.75)   | 0.319            |
| Iron                              | 4.56 (-0.50,9.62)     | 0.077            | -2.14 (-6.39,2.10)   | 0.322            |
| Vitamin B6 (diet and supplement)  | -0.52 (-0.91,-0.13)   | 0.009            | 0.18 (-0.22,0.59)    | 0.371            |
| Retinol (diet and supplement)     | -0.56 (-1.02,-0.10)   | 0.016            | -0.17 (-0.57,0.24)   | 0.418            |
| Valine                            | -3.58 (-7.34,0.18)    | 0.062            | -1.44 (-5.84,2.97)   | 0.522            |
| Vitamin B12 (diet and supplement) | 0.52 (0.21,0.82)      | 0.001            | -0.15 (-0.62,0.32)   | 0.525            |

Analyses are adjusted for age, sex, reported special diet, use of dietary supplements, moderate or heavy physical activity (hours daily), doctor diagnosed cardiovascular disease and diabetes, family history of hypertension, height, weight, and total energy intake. The SDs for each variable are listed in Tables 1 and 2.

**Supplementary Table 5. Heterogeneity estimates using random effects meta-analysis across the INTERMAP training set**

|                           | Systolic Blood Pressure |             |                | Diastolic Blood Pressure |             |                |
|---------------------------|-------------------------|-------------|----------------|--------------------------|-------------|----------------|
|                           | Q                       | p value (Q) | I <sup>2</sup> | Q                        | p value (Q) | I <sup>2</sup> |
| Nutrients from foods      |                         |             |                |                          |             |                |
| Alcohol                   | 17.68                   | 0.34        | 0.00           | 18.28                    | 0.31        | 1.51           |
| Animal Protein            | 14.76                   | 0.54        | 0.00           | 21.19                    | 0.17        | 15.05          |
| Beta-Carotene             | 12.12                   | 0.74        | 0.00           | 20.80                    | 0.19        | 13.46          |
| Caffeine                  | 17.62                   | 0.35        | 0.00           | 13.98                    | 0.60        | 0.00           |
| Calcium                   | 17.34                   | 0.36        | 0.00           | 14.13                    | 0.59        | 0.00           |
| Cholesterol               | 28.01                   | 0.03        | 35.75          | 28.28                    | 0.03        | 36.36          |
| Docosapentaenoic acid     | 13.09                   | 0.67        | 0.00           | 10.14                    | 0.86        | 0.00           |
| Iron                      | 15.49                   | 0.49        | 0.00           | 6.43                     | 0.98        | 0.00           |
| Magnesium                 | 13.77                   | 0.62        | 0.00           | 17.39                    | 0.36        | 0.00           |
| Myristoleic acid          | 17.37                   | 0.36        | 0.00           | 20.07                    | 0.22        | 10.32          |
| Palmitoleic acid          | 13.62                   | 0.63        | 0.00           | 21.57                    | 0.16        | 16.55          |
| Oleic acid                | 14.97                   | 0.53        | 0.00           | 12.02                    | 0.74        | 0.00           |
| Gadoleic acid             | 24.70                   | 0.08        | 27.12          | 25.63                    | 0.06        | 29.78          |
| Erucic acid               | 20.47                   | 0.20        | 12.05          | 16.68                    | 0.41        | 0.00           |
| Linoleic acid             | 23.87                   | 0.09        | 24.60          | 30.64                    | 0.01        | 41.25          |
| Dietary PFA               | 4.54                    | 0.97        | 0.00           | 4.67                     | 0.97        | 0.00           |
| Arachidonic acid          | 20.61                   | 0.19        | 12.66          | 18.26                    | 0.31        | 1.44           |
| Eicosapentaenoic acid     | 27.30                   | 0.04        | 34.07          | 21.35                    | 0.17        | 15.68          |
| Docosahexaenoic aci       | 14.87                   | 0.53        | 0.00           | 13.95                    | 0.60        | 0.00           |
| Phosphorus                | 22.15                   | 0.14        | 18.73          | 16.38                    | 0.43        | 0.00           |
| Linolenic acid            | 15.73                   | 0.47        | 0.00           | 28.61                    | 0.03        | 37.09          |
| Sodium to potassium ratio | 15.30                   | 0.50        | 0.00           | 15.86                    | 0.46        | 0.00           |
| Total protein             | 14.62                   | 0.55        | 0.00           | 15.70                    | 0.47        | 0.00           |
| Retinol                   | 10.65                   | 0.83        | 0.00           | 12.08                    | 0.74        | 0.00           |
| Selenium                  | 13.06                   | 0.67        | 0.00           | 16.18                    | 0.44        | 0.00           |
| Capric acid               | 24.22                   | 0.08        | 25.68          | 18.04                    | 0.32        | 0.24           |
| Lauric acid               | 17.45                   | 0.36        | 0.00           | 10.39                    | 0.85        | 0.00           |
| Myristic acid             | 23.28                   | 0.11        | 22.69          | 18.49                    | 0.30        | 2.66           |
| Palmitic acid             | 18.00                   | 0.32        | 0.02           | 14.43                    | 0.57        | 0.00           |
| Stearic acid              | 18.58                   | 0.29        | 3.10           | 14.89                    | 0.53        | 0.00           |
| Arachidic acid            | 21.42                   | 0.16        | 15.95          | 20.55                    | 0.20        | 12.40          |
| Behenic acid              | 19.23                   | 0.26        | 6.39           | 17.86                    | 0.33        | 0.00           |
| SFA 4:0                   | 20.62                   | 0.08        | 27.26          | 19.02                    | 0.12        | 21.15          |
| Caproic acid              | 23.44                   | 0.10        | 23.21          | 18.61                    | 0.29        | 3.30           |
| Caprylic acid             | 18.89                   | 0.27        | 4.69           | 13.85                    | 0.61        | 0.00           |
| Starch                    | 23.52                   | 0.10        | 23.48          | 16.74                    | 0.40        | 0.00           |
| Total Fat                 | 17.14                   | 0.38        | 0.00           | 15.25                    | 0.51        | 0.00           |
| Total MFA                 | 14.23                   | 0.58        | 0.00           | 12.84                    | 0.68        | 0.00           |
| Total SFA                 | 19.29                   | 0.25        | 6.69           | 14.76                    | 0.54        | 0.00           |

|                         |       |      |       |       |      |       |
|-------------------------|-------|------|-------|-------|------|-------|
| Total vitamin E         | 12.86 | 0.68 | 0.00  | 29.95 | 0.02 | 39.89 |
| Total carbohydrates     | 17.24 | 0.37 | 0.00  | 21.75 | 0.15 | 17.24 |
| Total Vitamin A         | 6.62  | 0.98 | 0.00  | 8.69  | 0.93 | 0.00  |
| Omega-3 polyunsaturates | 17.21 | 0.37 | 0.00  | 28.19 | 0.03 | 36.16 |
| Omega-6 polyunsaturates | 23.92 | 0.09 | 24.73 | 30.62 | 0.02 | 41.21 |
| Total fibre             | 11.07 | 0.81 | 0.00  | 8.00  | 0.95 | 0.00  |
| Trans-octadecenoic acid | 25.75 | 0.06 | 30.11 | 19.58 | 0.24 | 8.07  |
| Trans-octadecenoic acid | 20.85 | 0.18 | 13.68 | 16.25 | 0.44 | 0.00  |
| Total trans-fatty acids | 23.00 | 0.11 | 21.75 | 16.41 | 0.42 | 0.00  |
| Vegetable protein       | 11.12 | 0.80 | 0.00  | 9.95  | 0.87 | 0.00  |
| Total PFA               | 23.27 | 0.11 | 22.66 | 32.12 | 0.01 | 43.96 |
| Vitamin A               | 8.45  | 0.93 | 0.00  | 12.86 | 0.68 | 0.00  |
| Vitamin C               | 18.25 | 0.31 | 1.35  | 18.44 | 0.30 | 2.38  |
| Sugar                   | 19.65 | 0.24 | 8.40  | 14.35 | 0.57 | 0.00  |
| Cooper                  | 16.50 | 0.42 | 0.00  | 14.57 | 0.56 | 0.00  |
| Folacin                 | 14.52 | 0.56 | 0.00  | 10.53 | 0.84 | 0.00  |
| Niacin                  | 17.09 | 0.38 | 0.00  | 29.55 | 0.02 | 39.09 |
| Pantothenic Acid        | 12.71 | 0.69 | 0.00  | 14.54 | 0.56 | 0.00  |
| Riboflavin              | 14.29 | 0.58 | 0.00  | 15.60 | 0.48 | 0.00  |
| Thiamin                 | 14.30 | 0.58 | 0.00  | 15.33 | 0.50 | 0.00  |
| Vitamin B6              | 19.58 | 0.24 | 8.06  | 19.33 | 0.25 | 6.88  |
| Vitamin B12             | 10.83 | 0.82 | 0.00  | 10.84 | 0.82 | 0.00  |
| Heme iron               | 9.69  | 0.88 | 0.00  | 15.76 | 0.47 | 0.00  |
| Non-heme iron           | 15.71 | 0.47 | 0.00  | 6.62  | 0.98 | 0.00  |
| Alanine                 | 12.76 | 0.69 | 0.00  | 16.05 | 0.45 | 0.00  |
| Arginine                | 11.39 | 0.79 | 0.00  | 13.87 | 0.61 | 0.00  |
| Aspartame               | 12.13 | 0.73 | 0.00  | 13.32 | 0.65 | 0.00  |
| Glutamic acid           | 12.10 | 0.74 | 0.00  | 10.55 | 0.84 | 0.00  |
| Glycine                 | 9.72  | 0.88 | 0.00  | 15.55 | 0.48 | 0.00  |
| Histidine               | 11.75 | 0.76 | 0.00  | 17.01 | 0.38 | 0.00  |
| Isoleucine              | 14.11 | 0.59 | 0.00  | 14.76 | 0.54 | 0.00  |
| Leucine                 | 14.76 | 0.54 | 0.00  | 15.75 | 0.47 | 0.00  |
| Lysine                  | 12.47 | 0.71 | 0.00  | 16.53 | 0.42 | 0.00  |
| Methionine              | 18.28 | 0.31 | 1.52  | 20.47 | 0.20 | 12.07 |
| Phenylalanine           | 12.88 | 0.68 | 0.00  | 11.58 | 0.77 | 0.00  |
| Proline                 | 11.56 | 0.77 | 0.00  | 20.56 | 0.20 | 12.46 |
| Serine                  | 12.73 | 0.69 | 0.00  | 13.84 | 0.61 | 0.00  |
| Cystine                 | 10.50 | 0.84 | 0.00  | 10.82 | 0.82 | 0.00  |
| Threonine               | 12.72 | 0.69 | 0.00  | 14.32 | 0.57 | 0.00  |
| Tryptophan              | 16.96 | 0.39 | 0.00  | 13.30 | 0.65 | 0.00  |
| Tyrosine                | 13.68 | 0.62 | 0.00  | 15.34 | 0.50 | 0.00  |
| Valine                  | 13.71 | 0.62 | 0.00  | 12.63 | 0.70 | 0.00  |
| Sum of EPA, DPA and DHA | 21.08 | 0.18 | 14.62 | 18.04 | 0.32 | 0.24  |
| Urinary excretion       |       |      |       |       |      |       |

|                                      |       |      |       |       |      |       |
|--------------------------------------|-------|------|-------|-------|------|-------|
| Calcium                              | 6.07  | 0.99 | 0.00  | 18.51 | 0.30 | 2.73  |
| Magnesium                            | 7.98  | 0.95 | 0.00  | 17.47 | 0.36 | 0.00  |
| Sodium to potassium ratio            | 24.48 | 0.08 | 26.46 | 24.91 | 0.07 | 27.73 |
| Nutrients from foods and supplements |       |      |       |       |      |       |
| Alanine                              | 13.01 | 0.67 | 0.00  | 16.04 | 0.45 | 0.00  |
| Alcohol                              | 17.69 | 0.34 | 0.00  | 18.27 | 0.31 | 1.48  |
| Animal protein                       | 14.76 | 0.54 | 0.00  | 21.18 | 0.17 | 15.03 |
| Arginine                             | 11.78 | 0.76 | 0.00  | 13.64 | 0.63 | 0.00  |
| Aspartame                            | 12.68 | 0.70 | 0.00  | 13.14 | 0.66 | 0.00  |
| Beta-Carotene                        | 8.11  | 0.95 | 0.00  | 16.74 | 0.40 | 0.00  |
| Caffeine                             | 18.04 | 0.32 | 0.20  | 14.42 | 0.57 | 0.00  |
| Calcium                              | 24.08 | 0.09 | 25.24 | 16.03 | 0.45 | 0.00  |
| Cholesterol                          | 27.77 | 0.03 | 35.18 | 27.96 | 0.03 | 35.63 |
| Cooper                               | 16.35 | 0.43 | 0.00  | 16.50 | 0.42 | 0.00  |
| Cystine                              | 10.95 | 0.81 | 0.00  | 10.81 | 0.82 | 0.00  |
| Glutamic acid                        | 12.51 | 0.71 | 0.00  | 10.71 | 0.83 | 0.00  |
| Glycine                              | 9.36  | 0.90 | 0.00  | 15.12 | 0.52 | 0.00  |
| Histidine                            | 12.20 | 0.73 | 0.00  | 17.27 | 0.37 | 0.00  |
| Iron                                 | 18.78 | 0.28 | 4.14  | 8.73  | 0.92 | 0.00  |
| Isoleucine                           | 15.15 | 0.51 | 0.00  | 15.03 | 0.52 | 0.00  |
| Leucine                              | 15.82 | 0.47 | 0.00  | 16.03 | 0.45 | 0.00  |
| Lysine                               | 13.08 | 0.67 | 0.00  | 16.45 | 0.42 | 0.00  |
| Magnesium                            | 12.28 | 0.72 | 0.00  | 12.99 | 0.67 | 0.00  |
| Methionine                           | 18.83 | 0.28 | 4.41  | 20.30 | 0.21 | 11.34 |
| Myristoleic acid                     | 17.37 | 0.36 | 0.00  | 20.07 | 0.22 | 10.32 |
| Palmitoleic acid                     | 12.81 | 0.69 | 0.00  | 20.61 | 0.19 | 12.64 |
| Oleic acid                           | 14.91 | 0.53 | 0.00  | 12.04 | 0.74 | 0.00  |
| Gadoleic acid                        | 27.23 | 0.04 | 33.89 | 30.01 | 0.02 | 40.01 |
| Erucic acid                          | 22.18 | 0.14 | 18.86 | 19.34 | 0.25 | 6.91  |
| Niacin                               | 13.48 | 0.64 | 0.00  | 24.91 | 0.07 | 27.74 |
| Linoleic acid                        | 23.97 | 0.09 | 24.90 | 30.84 | 0.01 | 41.62 |
| Linolenic acid                       | 15.84 | 0.46 | 0.00  | 28.81 | 0.03 | 37.53 |
| Arachidonic acid                     | 20.00 | 0.22 | 10.00 | 17.70 | 0.34 | 0.00  |
| Eicosapentaenoic acid                | 16.36 | 0.29 | 2.18  | 15.79 | 0.33 | 0.00  |
| Gadoleic acid                        | 16.66 | 0.27 | 3.94  | 10.48 | 0.73 | 0.00  |
| Docosahexaenoic acid                 | 2.53  | 0.87 | 0.00  | 2.27  | 0.89 | 0.00  |
| Docosahexaenoic acid                 | 14.01 | 0.60 | 0.00  | 13.03 | 0.67 | 0.00  |
| Phenylalanine                        | 14.11 | 0.59 | 0.00  | 12.11 | 0.74 | 0.00  |
| Phosphorus                           | 21.02 | 0.18 | 14.37 | 15.12 | 0.52 | 0.00  |
| Sodium to potassium ratio            | 15.36 | 0.50 | 0.00  | 14.42 | 0.57 | 0.00  |
| Proline                              | 12.31 | 0.72 | 0.00  | 21.06 | 0.18 | 14.51 |
| Total protein                        | 15.04 | 0.52 | 0.00  | 15.64 | 0.48 | 0.00  |
| Retinol                              | 16.72 | 0.40 | 0.00  | 9.77  | 0.88 | 0.00  |
| Riboflavin                           | 36.29 | 0.00 | 50.40 | 22.14 | 0.14 | 18.68 |
| Selenium                             | 13.96 | 0.60 | 0.00  | 17.86 | 0.33 | 0.00  |

|                         |       |      |       |       |      |       |
|-------------------------|-------|------|-------|-------|------|-------|
| Serine                  | 14.16 | 0.59 | 0.00  | 14.51 | 0.56 | 0.00  |
| Capric acid             | 24.23 | 0.08 | 25.70 | 18.06 | 0.32 | 0.31  |
| Lauric acid             | 17.45 | 0.36 | 0.00  | 10.39 | 0.85 | 0.00  |
| Myristic acid           | 23.32 | 0.11 | 22.80 | 18.54 | 0.29 | 2.91  |
| Palmitic acid           | 17.98 | 0.33 | 0.00  | 14.34 | 0.57 | 0.00  |
| Stearic acid            | 18.57 | 0.29 | 3.06  | 14.85 | 0.54 | 0.00  |
| Arachidic acid          | 21.42 | 0.16 | 15.96 | 20.55 | 0.20 | 12.40 |
| Behenic acid            | 19.27 | 0.25 | 6.60  | 17.94 | 0.33 | 0.00  |
| SFA 4:0                 | 23.44 | 0.10 | 23.21 | 18.61 | 0.29 | 3.30  |
| Caproic acid            | 18.86 | 0.28 | 4.56  | 13.91 | 0.61 | 0.00  |
| Caprylic acid           | 23.52 | 0.10 | 23.45 | 16.74 | 0.40 | 0.00  |
| Thiamin                 | 13.26 | 0.65 | 0.00  | 5.60  | 0.99 | 0.00  |
| Threonine               | 13.58 | 0.63 | 0.00  | 14.49 | 0.56 | 0.00  |
| Total Fat               | 17.29 | 0.37 | 0.00  | 15.42 | 0.49 | 0.00  |
| Total MFA               | 14.12 | 0.59 | 0.00  | 12.90 | 0.68 | 0.00  |
| Total PFA               | 23.97 | 0.09 | 24.92 | 32.85 | 0.01 | 45.20 |
| Total SFA               | 19.28 | 0.25 | 6.63  | 14.70 | 0.55 | 0.00  |
| Total vitamin E         | 24.59 | 0.08 | 26.81 | 18.92 | 0.27 | 4.88  |
| Total carbohydrates     | 16.83 | 0.40 | 0.00  | 21.69 | 0.15 | 17.03 |
| Total Vitamin A         | 11.50 | 0.78 | 0.00  | 7.57  | 0.96 | 0.00  |
| Tryptophan              | 18.39 | 0.30 | 2.10  | 13.77 | 0.62 | 0.00  |
| Tyrosine                | 14.57 | 0.56 | 0.00  | 15.53 | 0.49 | 0.00  |
| Valine                  | 14.96 | 0.53 | 0.00  | 13.12 | 0.66 | 0.00  |
| Vegetable protein       | 11.12 | 0.80 | 0.00  | 9.94  | 0.87 | 0.00  |
| Vitamin B6              | 16.86 | 0.39 | 0.00  | 19.15 | 0.26 | 6.00  |
| Vitamin B12             | 25.22 | 0.07 | 28.63 | 34.39 | 0.00 | 47.66 |
| Vitamin C               | 20.29 | 0.21 | 11.28 | 23.92 | 0.09 | 24.74 |
| Total fibre             | 10.15 | 0.86 | 0.00  | 7.38  | 0.97 | 0.00  |
| Vitamin A               | 11.14 | 0.80 | 0.00  | 12.60 | 0.70 | 0.00  |
| Folacin                 | 14.83 | 0.54 | 0.00  | 9.19  | 0.91 | 0.00  |
| Omega-3 polyunsaturates | 17.86 | 0.33 | 0.00  | 30.14 | 0.02 | 40.27 |
| Omega-6 polyunsaturates | 24.04 | 0.09 | 25.13 | 30.84 | 0.01 | 41.64 |

**Supplementary Table 6. Heterogeneity estimates for random effects meta-analysis across the INTERMAP testing set**

|                           | Systolic Blood Pressure |             |                | Diastolic Blood Pressure |             |                |
|---------------------------|-------------------------|-------------|----------------|--------------------------|-------------|----------------|
|                           | Q                       | p value (Q) | I <sup>2</sup> | Q                        | p value (Q) | I <sup>2</sup> |
| Nutrients from foods      |                         |             |                |                          |             |                |
| Alcohol                   | 47.76                   | 0.00        | 62.31          | 46.93                    | 0.00        | 61.64          |
| Animal Protein            | 9.33                    | 0.90        | 0.00           | 10.83                    | 0.82        | 0.00           |
| Beta-Carotene             | 8.23                    | 0.94        | 0.00           | 12.62                    | 0.70        | 0.00           |
| Caffeine                  | 17.00                   | 0.39        | 0.00           | 12.13                    | 0.74        | 0.00           |
| Calcium                   | 13.43                   | 0.64        | 0.00           | 7.47                     | 0.96        | 0.00           |
| Cholesterol               | 18.59                   | 0.29        | 3.19           | 23.87                    | 0.09        | 24.60          |
| Docosapentaenoic acid     | 11.35                   | 0.73        | 0.00           | 12.04                    | 0.68        | 0.00           |
| Iron                      | 18.03                   | 0.32        | 0.19           | 29.04                    | 0.02        | 38.02          |
| Magnesium                 | 5.94                    | 0.99        | 0.00           | 13.15                    | 0.66        | 0.00           |
| Myristoleic acid          | 17.78                   | 0.34        | 0.00           | 21.30                    | 0.17        | 15.51          |
| Palmitoleic acid          | 19.98                   | 0.22        | 9.92           | 16.15                    | 0.44        | 0.00           |
| Oleic acid                | 13.04                   | 0.67        | 0.00           | 12.08                    | 0.74        | 0.00           |
| Gadoleic acid             | 18.38                   | 0.30        | 2.05           | 16.25                    | 0.44        | 0.00           |
| Erucic acid               | 23.00                   | 0.11        | 21.74          | 19.65                    | 0.24        | 8.38           |
| Linoleic acid             | 9.90                    | 0.87        | 0.00           | 16.29                    | 0.43        | 0.00           |
| Linolenic acid            | 19.87                   | 0.23        | 9.39           | 23.97                    | 0.09        | 24.90          |
| Dietary PFA               | 8.99                    | 0.62        | 0.00           | 11.09                    | 0.44        | 0.00           |
| Arachidonic acid          | 10.87                   | 0.82        | 0.00           | 13.97                    | 0.60        | 0.00           |
| Eicosapentaenoic acid     | 10.97                   | 0.81        | 0.00           | 11.17                    | 0.80        | 0.00           |
| Docosahexaenoic acid      | 12.30                   | 0.72        | 0.00           | 11.42                    | 0.78        | 0.00           |
| Phosphorus                | 11.50                   | 0.78        | 0.00           | 16.33                    | 0.43        | 0.00           |
| Sodium to potassium ratio | 8.14                    | 0.94        | 0.00           | 5.52                     | 0.99        | 0.00           |
| Total protein             | 7.51                    | 0.96        | 0.00           | 8.43                     | 0.93        | 0.00           |
| Retinol                   | 11.60                   | 0.77        | 0.00           | 13.86                    | 0.61        | 0.00           |
| Selenium                  | 7.51                    | 0.96        | 0.00           | 12.16                    | 0.73        | 0.00           |
| Capric acid               | 12.71                   | 0.69        | 0.00           | 14.57                    | 0.56        | 0.00           |
| Lauric acid               | 11.82                   | 0.76        | 0.00           | 24.15                    | 0.09        | 25.46          |
| Myristic acid             | 11.43                   | 0.78        | 0.00           | 19.19                    | 0.26        | 6.18           |
| Palmitic acid             | 16.04                   | 0.45        | 0.00           | 17.08                    | 0.38        | 0.00           |
| Stearic acid              | 17.74                   | 0.34        | 0.00           | 22.39                    | 0.13        | 19.60          |
| Arachidic acid            | 6.66                    | 0.98        | 0.00           | 18.16                    | 0.31        | 0.90           |
| Behenic acid              | 7.63                    | 0.96        | 0.00           | 16.31                    | 0.43        | 0.00           |
| SFA 4:0                   | 15.91                   | 0.25        | 5.73           | 12.61                    | 0.48        | 0.00           |
| Caproic acid              | 20.24                   | 0.21        | 11.06          | 15.63                    | 0.48        | 0.00           |
| Caprylic acid             | 14.63                   | 0.55        | 0.00           | 19.99                    | 0.22        | 9.95           |
| Starch                    | 25.26                   | 0.07        | 28.74          | 28.43                    | 0.03        | 36.69          |
| Total Fat                 | 13.02                   | 0.67        | 0.00           | 15.42                    | 0.49        | 0.00           |
| Total MFA                 | 12.35                   | 0.72        | 0.00           | 10.00                    | 0.87        | 0.00           |
| Total PFA                 | 10.13                   | 0.86        | 0.00           | 17.28                    | 0.37        | 0.00           |

|                         |       |      |       |       |      |       |
|-------------------------|-------|------|-------|-------|------|-------|
| Total SFA               | 15.26 | 0.51 | 0.00  | 19.24 | 0.26 | 6.45  |
| Total vitamin E         | 12.18 | 0.73 | 0.00  | 14.37 | 0.57 | 0.00  |
| Total carbohydrates     | 31.72 | 0.01 | 43.26 | 37.88 | 0.00 | 52.49 |
| Total Vitamin A         | 6.49  | 0.98 | 0.00  | 11.06 | 0.81 | 0.00  |
| Omega-3 polyunsaturates | 17.55 | 0.35 | 0.00  | 20.11 | 0.22 | 10.49 |
| Omega-6 polyunsaturates | 10.14 | 0.86 | 0.00  | 16.41 | 0.43 | 0.00  |
| Total fibre             | 12.08 | 0.74 | 0.00  | 10.91 | 0.81 | 0.00  |
| Trans-octadecenoic acid | 14.80 | 0.54 | 0.00  | 18.83 | 0.28 | 4.41  |
| Trans-octadecenoic acid | 14.94 | 0.53 | 0.00  | 20.20 | 0.21 | 10.88 |
| Total trans-fatty acids | 14.33 | 0.57 | 0.00  | 19.50 | 0.24 | 7.69  |
| Vegetable protein       | 10.26 | 0.85 | 0.00  | 16.96 | 0.39 | 0.00  |
| Vitamin A               | 4.85  | 1.00 | 0.00  | 12.17 | 0.73 | 0.00  |
| Vitamin C               | 19.51 | 0.24 | 7.76  | 15.44 | 0.49 | 0.00  |
| Sugar                   | 20.16 | 0.21 | 10.72 | 22.95 | 0.12 | 21.56 |
| Cooper                  | 4.21  | 1.00 | 0.00  | 7.50  | 0.96 | 0.00  |
| Folacin                 | 21.53 | 0.16 | 16.40 | 15.88 | 0.46 | 0.00  |
| Niacin                  | 22.34 | 0.13 | 19.43 | 21.87 | 0.15 | 17.71 |
| Pantothenic Acid        | 14.25 | 0.58 | 0.00  | 13.16 | 0.66 | 0.00  |
| Riboflavin              | 14.76 | 0.54 | 0.00  | 20.09 | 0.22 | 10.39 |
| Thiamin                 | 13.91 | 0.61 | 0.00  | 12.26 | 0.73 | 0.00  |
| Vitamin B6              | 26.57 | 0.05 | 32.25 | 19.29 | 0.25 | 6.69  |
| Vitamin B12             | 6.93  | 0.97 | 0.00  | 9.56  | 0.89 | 0.00  |
| Heme iron               | 8.31  | 0.94 | 0.00  | 11.68 | 0.77 | 0.00  |
| Non-heme iron           | 20.21 | 0.21 | 10.95 | 29.77 | 0.02 | 39.54 |
| Alanine                 | 9.70  | 0.88 | 0.00  | 11.00 | 0.81 | 0.00  |
| Arginine                | 11.03 | 0.81 | 0.00  | 11.67 | 0.77 | 0.00  |
| Aspartame               | 9.45  | 0.89 | 0.00  | 10.28 | 0.85 | 0.00  |
| Cystine                 | 10.25 | 0.85 | 0.00  | 15.22 | 0.51 | 0.00  |
| Glutamic acid           | 10.27 | 0.85 | 0.00  | 9.98  | 0.87 | 0.00  |
| Glycine                 | 13.17 | 0.66 | 0.00  | 13.60 | 0.63 | 0.00  |
| Histidine               | 8.39  | 0.94 | 0.00  | 9.02  | 0.91 | 0.00  |
| Isoleucine              | 7.37  | 0.97 | 0.00  | 7.08  | 0.97 | 0.00  |
| Leucine                 | 7.89  | 0.95 | 0.00  | 7.89  | 0.95 | 0.00  |
| Lysine                  | 8.03  | 0.95 | 0.00  | 7.91  | 0.95 | 0.00  |
| Methionine              | 9.45  | 0.89 | 0.00  | 9.31  | 0.90 | 0.00  |
| Phenylalanine           | 7.39  | 0.96 | 0.00  | 8.04  | 0.95 | 0.00  |
| Proline                 | 9.98  | 0.87 | 0.00  | 7.50  | 0.96 | 0.00  |
| Serine                  | 6.99  | 0.97 | 0.00  | 8.84  | 0.92 | 0.00  |
| Threonine               | 7.61  | 0.96 | 0.00  | 8.43  | 0.94 | 0.00  |
| Tryptophan              | 7.96  | 0.95 | 0.00  | 10.12 | 0.86 | 0.00  |
| Tyrosine                | 7.93  | 0.95 | 0.00  | 7.48  | 0.96 | 0.00  |
| Valine                  | 7.09  | 0.97 | 0.00  | 8.17  | 0.94 | 0.00  |
| long_O7                 | 10.66 | 0.83 | 0.00  | 10.22 | 0.86 | 0.00  |
| Urinary excretion       |       |      |       |       |      |       |
| Calcium                 | 20.55 | 0.20 | 12.42 | 18.53 | 0.29 | 2.86  |



|                                      |       |      |       |       |      |       |
|--------------------------------------|-------|------|-------|-------|------|-------|
| Magnesium                            | 10.56 | 0.84 | 0.00  | 10.12 | 0.86 | 0.00  |
| Sodium to potassium ratio            | 21.09 | 0.17 | 14.67 | 21.11 | 0.17 | 14.74 |
| Nutrients from foods and supplements |       |      |       |       |      |       |
| Alanine                              | 10.62 | 0.83 | 0.00  | 10.52 | 0.84 | 0.00  |
| Alcohol                              | 47.76 | 0.00 | 62.31 | 46.93 | 0.00 | 61.64 |
| Animal protein                       | 9.35  | 0.90 | 0.00  | 10.83 | 0.82 | 0.00  |
| Arginine                             | 11.27 | 0.79 | 0.00  | 11.91 | 0.75 | 0.00  |
| Aspartame                            | 9.95  | 0.87 | 0.00  | 10.06 | 0.86 | 0.00  |
| Beta-Carotene                        | 10.24 | 0.85 | 0.00  | 13.50 | 0.64 | 0.00  |
| Caffeine                             | 17.10 | 0.38 | 0.00  | 12.20 | 0.73 | 0.00  |
| Calcium                              | 10.49 | 0.84 | 0.00  | 11.12 | 0.80 | 0.00  |
| Cholesterol                          | 19.01 | 0.27 | 5.33  | 24.15 | 0.09 | 25.48 |
| Cooper                               | 10.91 | 0.82 | 0.00  | 11.28 | 0.79 | 0.00  |
| Cystine                              | 10.45 | 0.84 | 0.00  | 14.91 | 0.53 | 0.00  |
| Glutamic acid                        | 10.09 | 0.86 | 0.00  | 9.72  | 0.88 | 0.00  |
| Glycine                              | 15.79 | 0.47 | 0.00  | 13.49 | 0.64 | 0.00  |
| Histidine                            | 9.00  | 0.91 | 0.00  | 8.84  | 0.92 | 0.00  |
| Iron                                 | 12.33 | 0.72 | 0.00  | 9.68  | 0.88 | 0.00  |
| Isoleucine                           | 7.70  | 0.96 | 0.00  | 6.78  | 0.98 | 0.00  |
| Leucine                              | 8.23  | 0.94 | 0.00  | 7.53  | 0.96 | 0.00  |
| Lysine                               | 8.59  | 0.93 | 0.00  | 7.58  | 0.96 | 0.00  |
| Magnesium                            | 8.74  | 0.92 | 0.00  | 16.52 | 0.42 | 0.00  |
| Methionine                           | 10.31 | 0.85 | 0.00  | 9.05  | 0.91 | 0.00  |
| Myristoleic acid                     | 17.78 | 0.34 | 0.00  | 21.30 | 0.17 | 15.51 |
| Palmitoleic acid                     | 20.83 | 0.19 | 13.58 | 16.87 | 0.39 | 0.00  |
| Oleic acid                           | 13.10 | 0.67 | 0.00  | 12.20 | 0.73 | 0.00  |
| Gadoleic acid                        | 18.65 | 0.29 | 3.48  | 20.85 | 0.18 | 13.67 |
| Erucic acid                          | 22.99 | 0.11 | 21.71 | 23.10 | 0.11 | 22.09 |
| Niacin                               | 13.69 | 0.62 | 0.00  | 8.11  | 0.95 | 0.00  |
| Linoleic acid                        | 9.90  | 0.87 | 0.00  | 16.34 | 0.43 | 0.00  |
| Linolenic acid                       | 19.85 | 0.23 | 9.32  | 24.18 | 0.09 | 25.55 |
| Arachidonic acid                     | 11.42 | 0.78 | 0.00  | 14.29 | 0.58 | 0.00  |
| Eicosapentaenoic acid                | 12.78 | 0.54 | 0.00  | 13.83 | 0.46 | 0.00  |
| Gadoleic acid                        | 11.94 | 0.61 | 0.00  | 13.81 | 0.46 | 0.00  |
| Docosahexaenoic acid                 | 1.19  | 0.95 | 0.00  | 4.05  | 0.54 | 0.00  |
| Docosahexaenoic acid                 | 13.50 | 0.64 | 0.00  | 15.70 | 0.47 | 0.00  |
| Phenylalanine                        | 7.71  | 0.96 | 0.00  | 7.83  | 0.95 | 0.00  |
| Phosphorus                           | 11.02 | 0.81 | 0.00  | 16.99 | 0.39 | 0.00  |
| Sodium to potassium ratio            | 7.99  | 0.95 | 0.00  | 5.59  | 0.99 | 0.00  |
| Proline                              | 9.58  | 0.89 | 0.00  | 7.19  | 0.97 | 0.00  |
| Total protein                        | 8.01  | 0.95 | 0.00  | 7.87  | 0.95 | 0.00  |
| Retinol                              | 10.36 | 0.85 | 0.00  | 11.38 | 0.79 | 0.00  |
| Riboflavin                           | 18.40 | 0.30 | 2.18  | 12.49 | 0.71 | 0.00  |
| Selenium                             | 11.99 | 0.74 | 0.00  | 13.40 | 0.64 | 0.00  |
| Serine                               | 7.10  | 0.97 | 0.00  | 8.34  | 0.94 | 0.00  |

|                         |       |      |       |       |      |       |
|-------------------------|-------|------|-------|-------|------|-------|
| Capric acid             | 12.71 | 0.69 | 0.00  | 14.57 | 0.56 | 0.00  |
| Lauric acid             | 11.82 | 0.76 | 0.00  | 24.15 | 0.09 | 25.46 |
| Myristic acid           | 11.50 | 0.78 | 0.00  | 19.36 | 0.25 | 7.04  |
| Palmitic acid           | 16.13 | 0.44 | 0.00  | 17.25 | 0.37 | 0.00  |
| Stearic acid            | 17.79 | 0.34 | 0.00  | 22.45 | 0.13 | 19.83 |
| Arachidic acid          | 6.66  | 0.98 | 0.00  | 18.16 | 0.31 | 0.91  |
| Behenic acid            | 10.41 | 0.84 | 0.00  | 22.73 | 0.12 | 20.81 |
| SFA 4:0                 | 20.24 | 0.21 | 11.06 | 15.63 | 0.48 | 0.00  |
| Caproic acid            | 14.63 | 0.55 | 0.00  | 19.99 | 0.22 | 9.95  |
| Caprylic acid           | 25.29 | 0.06 | 28.83 | 28.45 | 0.03 | 36.73 |
| Thiamin                 | 14.10 | 0.59 | 0.00  | 9.65  | 0.88 | 0.00  |
| Threonine               | 8.29  | 0.94 | 0.00  | 8.03  | 0.95 | 0.00  |
| Total Fat               | 13.87 | 0.61 | 0.00  | 15.93 | 0.46 | 0.00  |
| Total MFA               | 12.53 | 0.71 | 0.00  | 10.33 | 0.85 | 0.00  |
| Total PFA               | 10.19 | 0.86 | 0.00  | 17.63 | 0.35 | 0.00  |
| Total SFA               | 15.33 | 0.50 | 0.00  | 19.42 | 0.25 | 7.30  |
| Total vitamin E         | 19.22 | 0.26 | 6.35  | 9.03  | 0.91 | 0.00  |
| Total carbohydrates     | 32.07 | 0.01 | 43.87 | 37.91 | 0.00 | 52.52 |
| Total Vitamin A         | 9.11  | 0.91 | 0.00  | 13.57 | 0.63 | 0.00  |
| Tryptophan              | 7.95  | 0.95 | 0.00  | 10.49 | 0.84 | 0.00  |
| Tyrosine                | 8.30  | 0.94 | 0.00  | 7.17  | 0.97 | 0.00  |
| Valine                  | 7.33  | 0.97 | 0.00  | 7.79  | 0.95 | 0.00  |
| Vegetable protein       | 10.26 | 0.85 | 0.00  | 16.95 | 0.39 | 0.00  |
| Vitamin B6              | 26.00 | 0.05 | 30.78 | 18.12 | 0.32 | 0.65  |
| Vitamin B12             | 19.37 | 0.25 | 7.05  | 8.83  | 0.92 | 0.00  |
| Vitamin C               | 23.24 | 0.11 | 22.56 | 24.57 | 0.08 | 26.74 |
| Total fibre             | 11.90 | 0.75 | 0.00  | 11.17 | 0.80 | 0.00  |
| Vitamin A               | 8.18  | 0.94 | 0.00  | 13.78 | 0.61 | 0.00  |
| Folacin                 | 29.60 | 0.02 | 39.19 | 23.15 | 0.11 | 22.26 |
| Omega-3 polyunsaturates | 17.48 | 0.36 | 0.00  | 21.05 | 0.18 | 14.48 |
| Omega-6 polyunsaturates | 10.15 | 0.86 | 0.00  | 16.48 | 0.42 | 0.00  |

**Supplementary Table 7. Heterogeneity estimates for random effects meta-analysis across the NHANES cohorts**

|                                             | Q     | p value (Q) | I <sup>2</sup> |
|---------------------------------------------|-------|-------------|----------------|
| <b>Systolic Blood Pressure</b>              |       |             |                |
| <i>Nutrients from foods</i>                 |       |             |                |
| Alcohol (gm)                                | 2.48  | 0.479       | 0              |
| Calcium (mg)                                | 4.71  | 0.194       | 36             |
| Copper (mg)                                 | 6.15  | 0.104       | 51             |
| Folic acid (mcg)                            | 0.76  | 0.684       | 0              |
| Dietary fiber (gm)                          | 13.60 | 0.004       | 78             |
| Iron (mg)                                   | 3.83  | 0.281       | 22             |
| Magnesium (mg)                              | 13.41 | 0.004       | 78             |
| Phosphorus (mg)                             | 6.25  | 0.100       | 52             |
| Thiamin (mg)                                | 3.19  | 0.363       | 6              |
| Riboflavin (mg)                             | 5.39  | 0.146       | 44             |
| Sodium/Potassium ratio                      | 9.17  | 0.027       | 67             |
| <i>Nutrients from foods and supplements</i> |       |             |                |
| Total Dietary Fiber (gm)                    | 12.93 | 0.005       | 77             |
| Total Magnesium (mg)                        | 11.03 | 0.012       | 73             |
| Total Phosphorus (mg)                       | 8.69  | 0.034       | 65             |
| <i>Serum biomarkers</i>                     |       |             |                |
| Folate (ng/mL)                              | 1.22  | 0.748       | 0              |
| Iron (ug/dL)                                | 0.34  | 0.952       | 0              |
| Calcium (mg/dL)                             | 1.20  | 0.753       | 0              |
| Phosphorus (mg/dL)                          | 0.64  | 0.886       | 0              |
| <b>Diastolic Blood Pressure</b>             |       |             |                |
| <i>Nutrients from foods</i>                 |       |             |                |
| Alcohol (gm)                                | 2.64  | 0.450       | 0              |
| Folic acid (mcg)                            | 5.89  | 0.053       | 66             |
| Magnesium (mg)                              | 7.98  | 0.046       | 62             |
| Phosphorus (mg)                             | 5.89  | 0.117       | 49             |
| Riboflavin (Vitamin B2) (mg)                | 2.32  | 0.509       | 0              |
| <i>Nutrients from foods and supplements</i> |       |             |                |
| Total Magnesium (mg)                        | 8.89  | 0.031       | 66             |
| Total Phosphorus (mg)                       | 6.56  | 0.087       | 54             |
| <i>Serum biomarkers</i>                     |       |             |                |
| Folate (ng/mL)                              | 5.30  | 0.151       | 43             |
| Phosphorus (mg/dL)                          | 1.86  | 0.601       | 0              |

**Supplementary Figure 1. Power calculations in INTERMAP study to detect different effect sizes per 1SD based on models with  $R^2=0.2$**

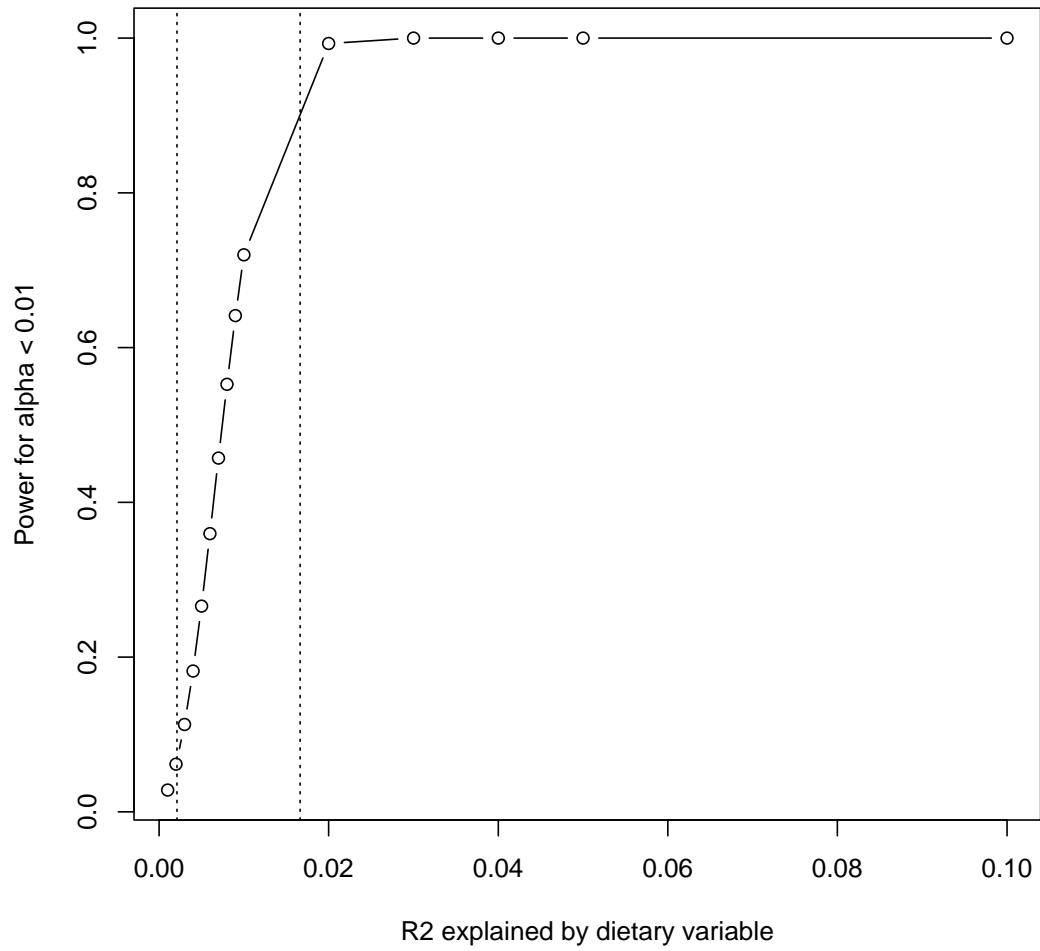

Supplement: NIHMS420740-supplement-1.pdf [file NIHMS420740-supplement-1.pdf]
